# Supplementary material for: A sensitive and selective red fluorescent probe for imaging of cysteine in living cells and animals
Source: Royal Society of Chemistry journal article supplement (doi:10.1039/c7ay00155j), 2017-01-01
Supplement: c7ay00155j1.pdf [file c7ay00155j1.pdf]

**Electronic Supplementary data For**

**A sensitive and selective red fluorescent probe for imaging of  
cysteine in living cells and animals**

Xuezhen Song, Baoli Dong, Xiuqi Kong, Chao Wang, Nan Zhang, Weiyong Lin\*

Institute of Fluorescent Probes for Biological Imaging, School of Chemistry and  
Chemical Engineering, School of Materials Science and Engineering, University of  
Jinan, Jinan, Shandong 250022, P.R. China

\*Corresponding Author.

Tel.: +86 53182769108.

E-mail address: weiyonglin2013@163.com.

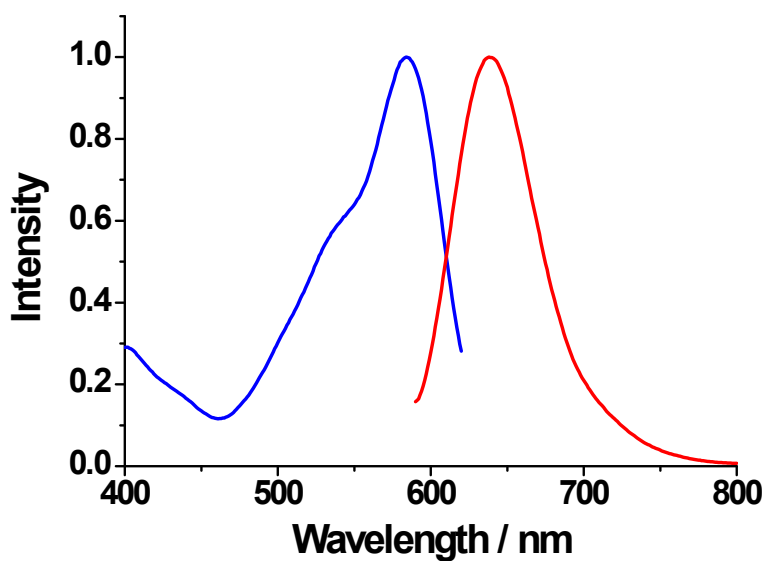

**Fig. S1** Normalized excitation spectrum (blue,  $\lambda_{em} = 638$  nm) and emission spectrum (red,  $\lambda_{ex} = 556$  nm) of 5  $\mu$ M **RCys** in the presence of 100  $\mu$ M Cys in PBS (5% methanol, pH = 7.4)

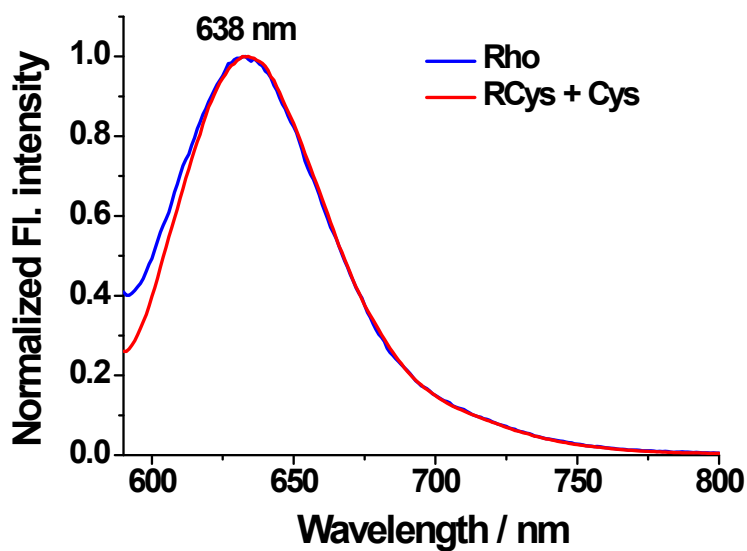

**Fig. S2** Normalized fluorescence spectrum of 5  $\mu$ M **Rho** (blue) and 5  $\mu$ M **RCys** + 100  $\mu$ M Cys (red) under excitation at 556 nm in PBS (5% MeOH, pH = 7.4).

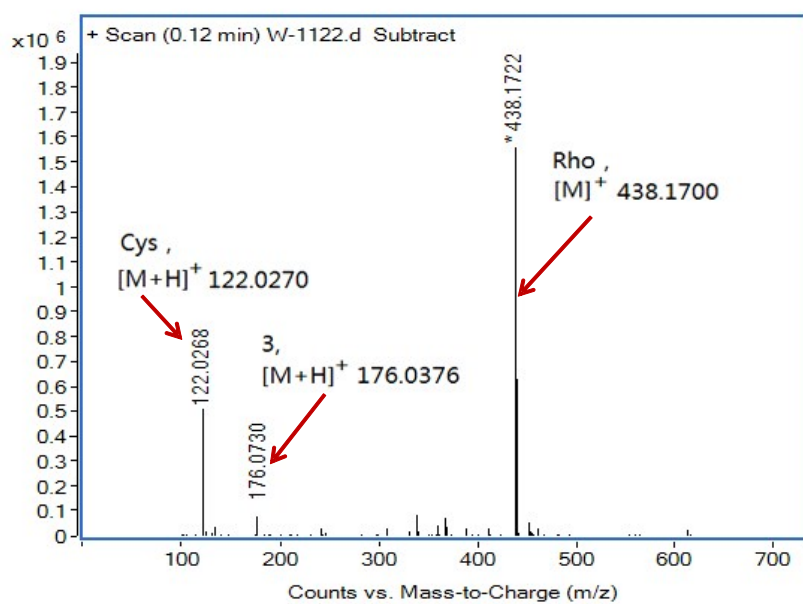

**Fig. S3** HRMS assay of the reaction products of **RCys** with Cys.

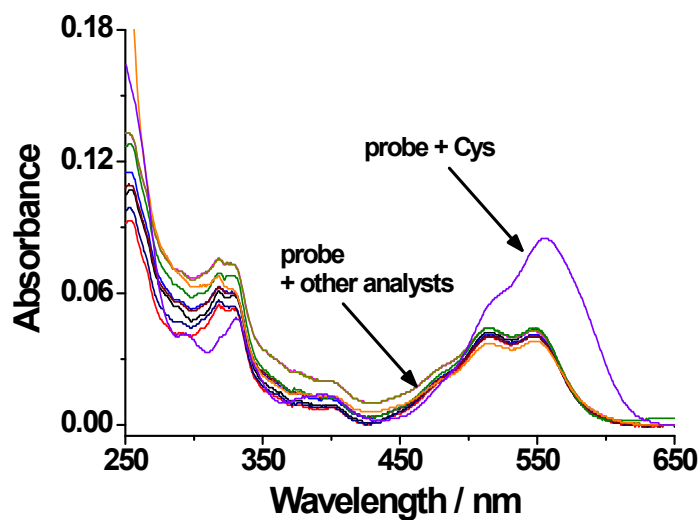

**Fig. S4** Absorption spectra of 5  $\mu\text{M}$  **RCys** in presence of various species in PBS buffer (20 mM, 5% methanol, pH = 7.4).

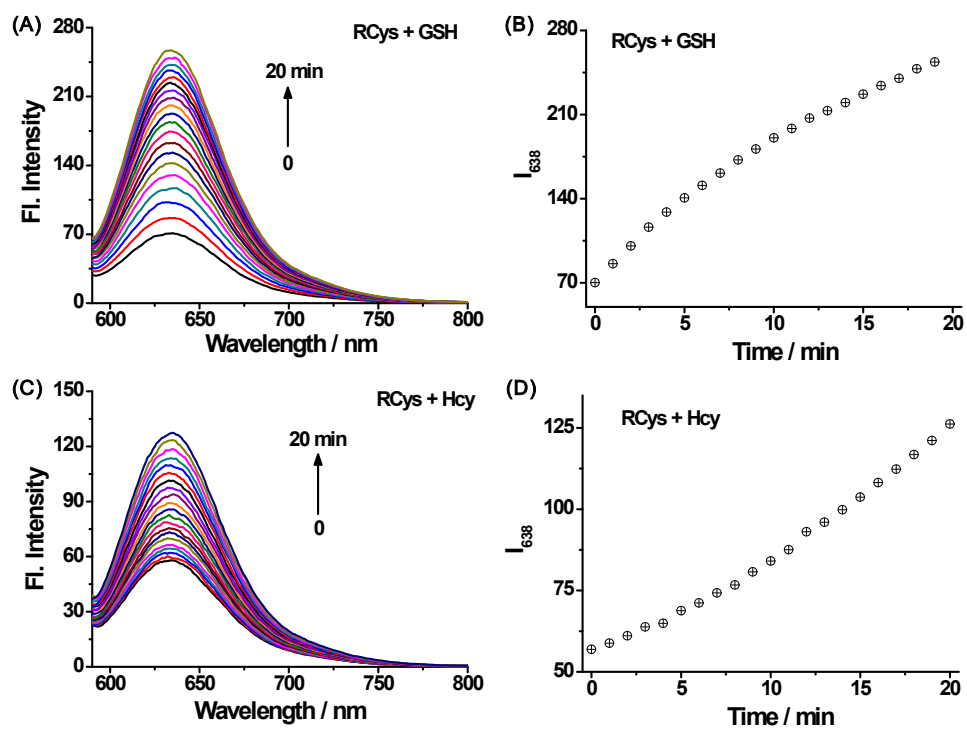

**Fig. S5** Time-dependent fluorescence spectra and intensities at 638 nm of 5  $\mu\text{M}$  RCys in presence of 1 mM GSH (A, B) and 100  $\mu\text{M}$  Hcy (C, D) under excitation at 580 nm in PBS (20 mM, 5% methanol, pH = 7.4).

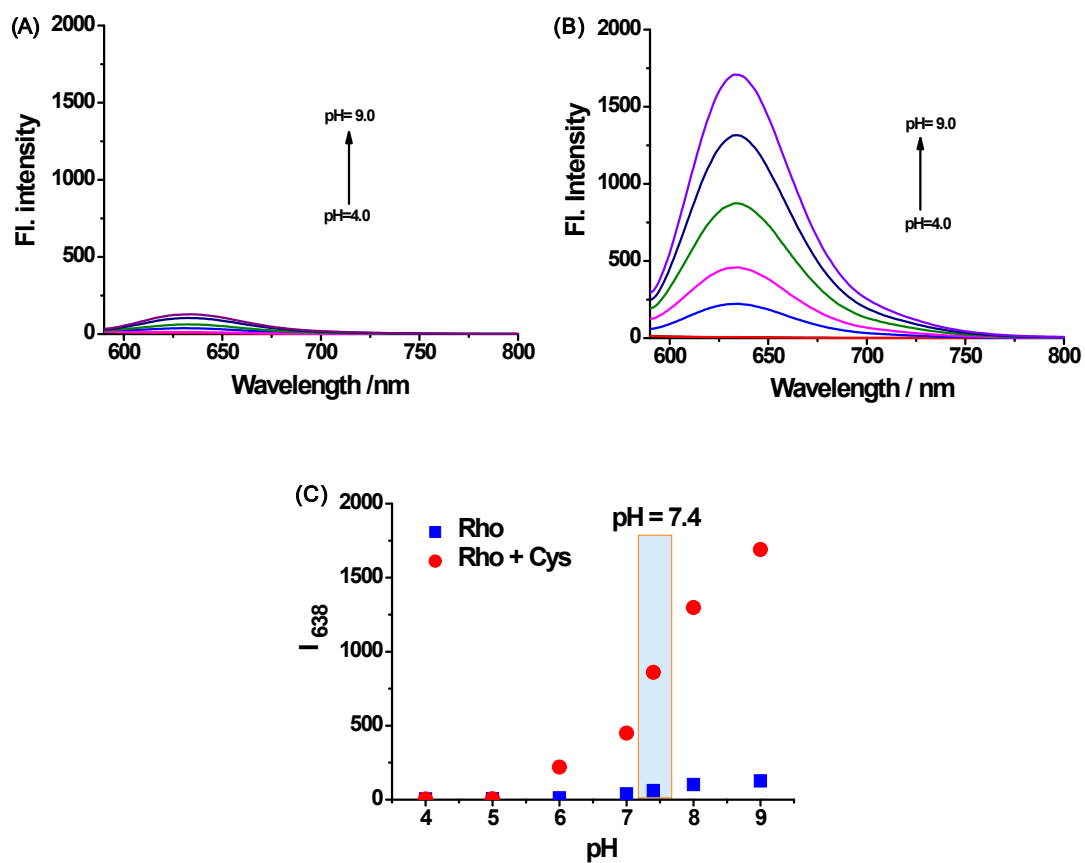

**Fig. S6** (A) Fluorescence spectra of 5  $\mu\text{M}$  RCys at various pH. (B) Fluorescence spectra of 5  $\mu\text{M}$  RCys in presence of 100  $\mu\text{M}$  Cys at various pH. (C) Fluorescence intensity at 638 nm of 5  $\mu\text{M}$  RCys in absence and presence of 100  $\mu\text{M}$  Cys at various pH.  $\lambda_{\text{ex}} = 580$  nm.

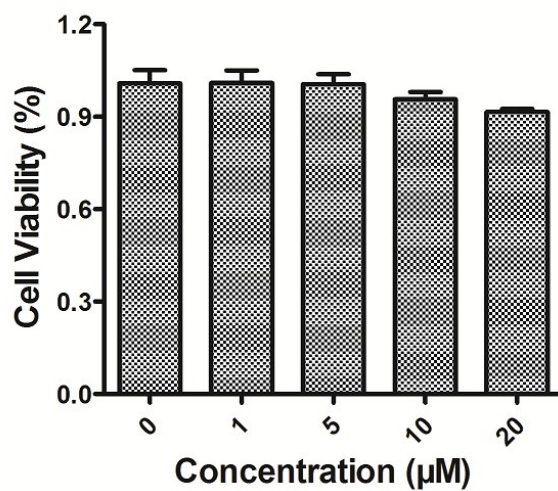

**Fig. S7** Survivability of the HeLa cells after treatment with various concentrations of RCys.

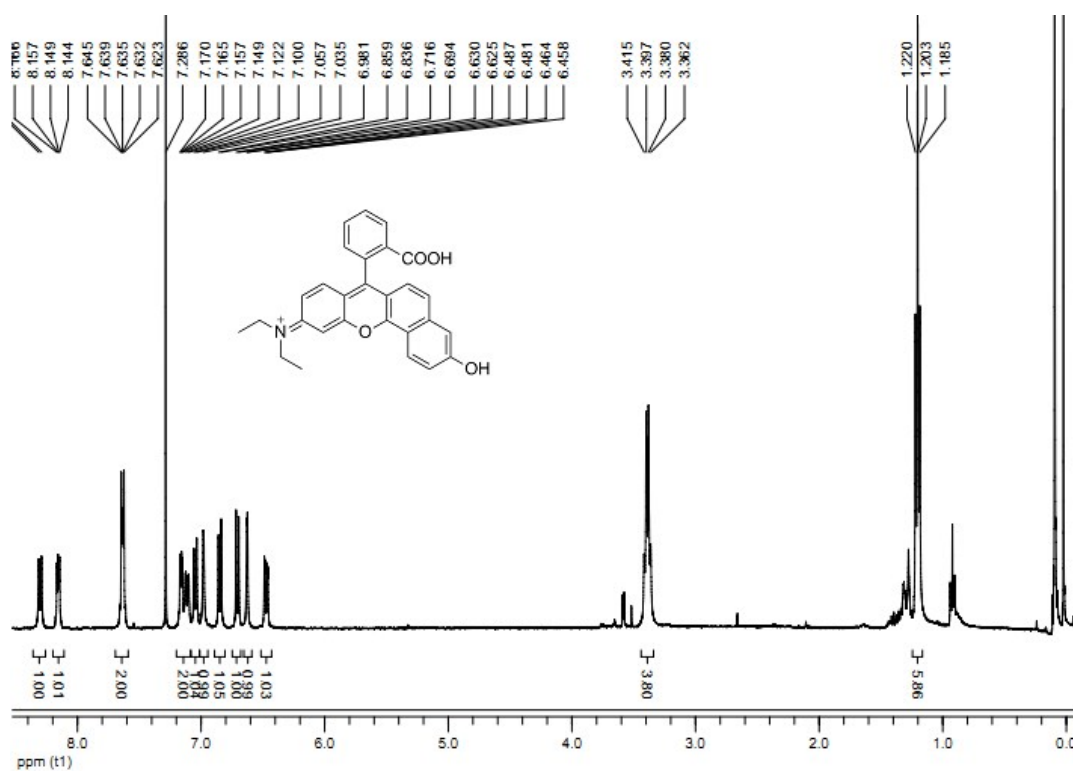

**Fig. S8**  $^1\text{H}$  NMR data ( $\text{CDCl}_3$ ) of Rho

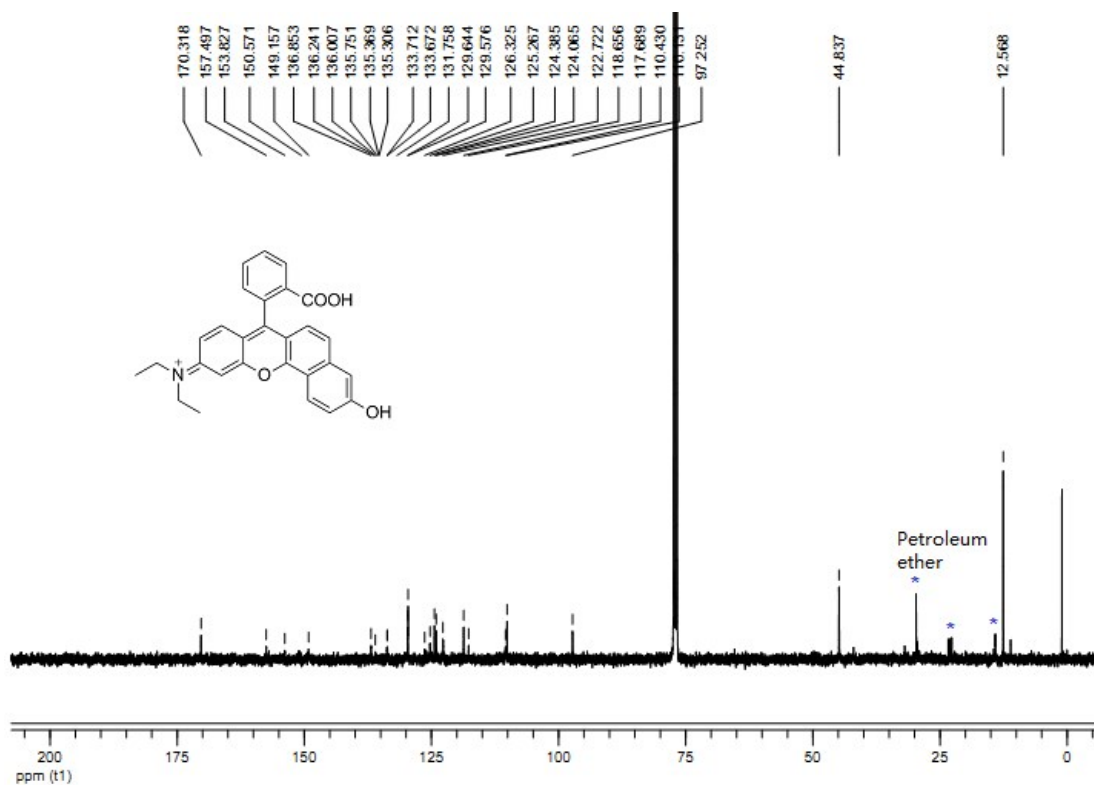

**Fig. S9**  $^{13}\text{C}$  NMR data ( $\text{CDCl}_3$ ) of Rho

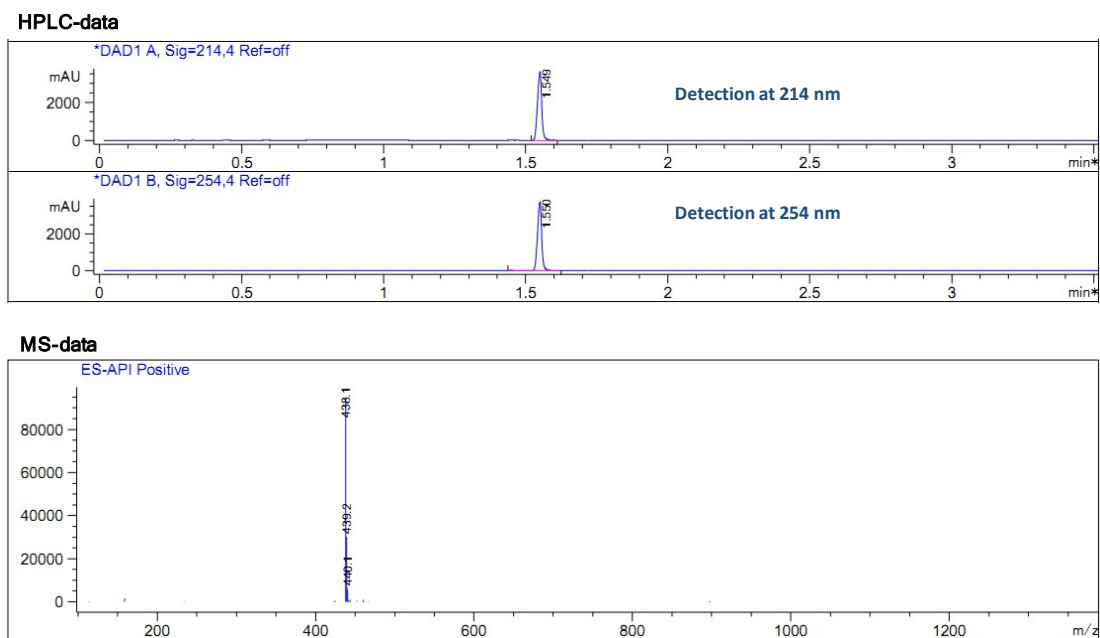

**Fig. S10** HPLC-MS data of Rho

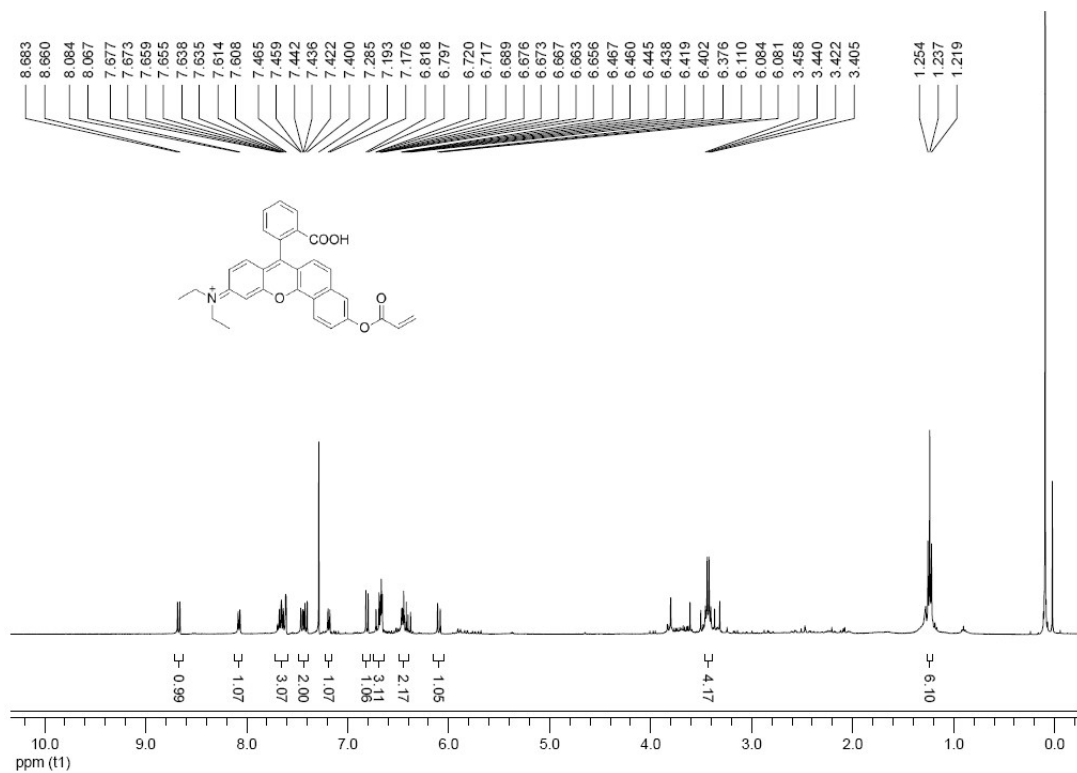

**Fig. S11** <sup>1</sup>H NMR data (CDCl<sub>3</sub>) of RCys

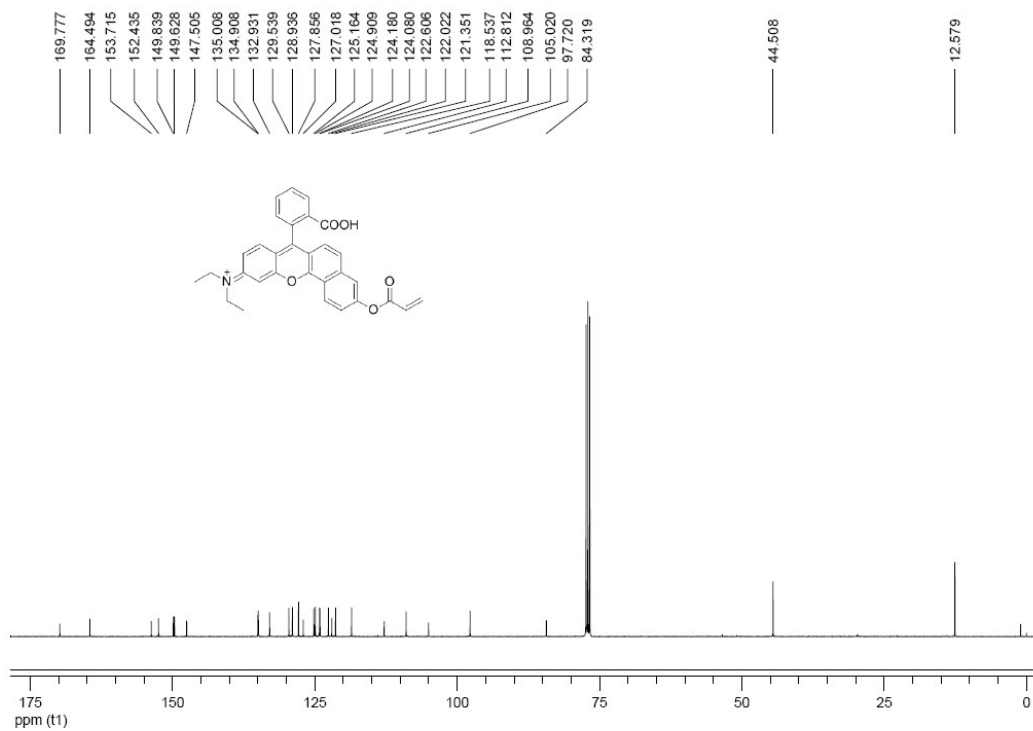

**Fig. S12** <sup>13</sup>C NMR data (CDCl<sub>3</sub>) of RCys



### HPLC-data

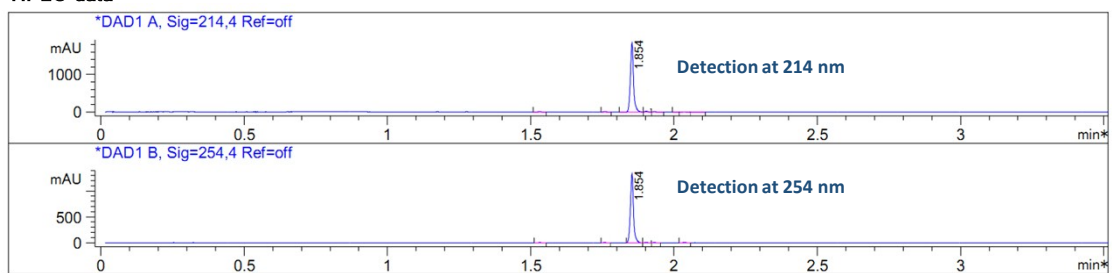

### MS-data

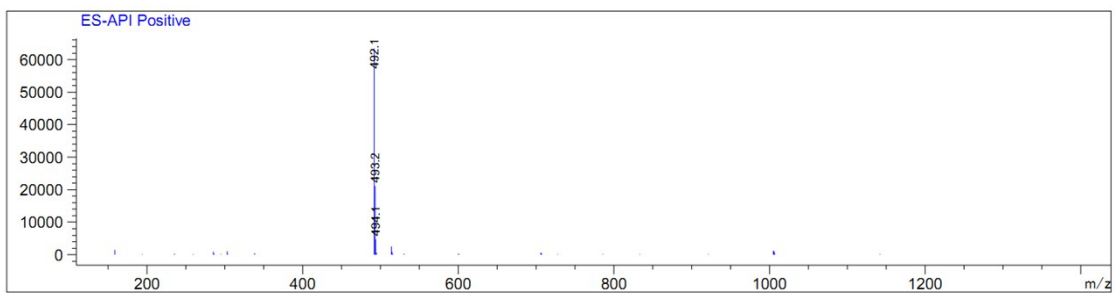

**Fig. S13** HPLC-MS data of RCys.
